# Supplementary material for: The catabolism of 3,3’-thiodipropionic acid in Variovorax paradoxus strain TBEA6: A proteomic analysis
Source: PLOS journal article supplement (doi:10.1371/journal.pone.0211876), 2019-02-11

**S1 Fig.: 2D-gels from the second biological experiment with spot labels.** Cells cultivated with Gluconate and TDP in comparison were disrupted and proteins extracted for 2D-gel analysis. Proteins (1.5  $\mu\text{g}$  per gel) were firstly separated by isoelectric point (pH 5 to pH 8) and secondly by molecular weight. Proteins were stained with Coomassie Brilliant Blue, scanned, labeled, and analyzed via the Delta2D Software. Spot labels are displayed on the fused images.

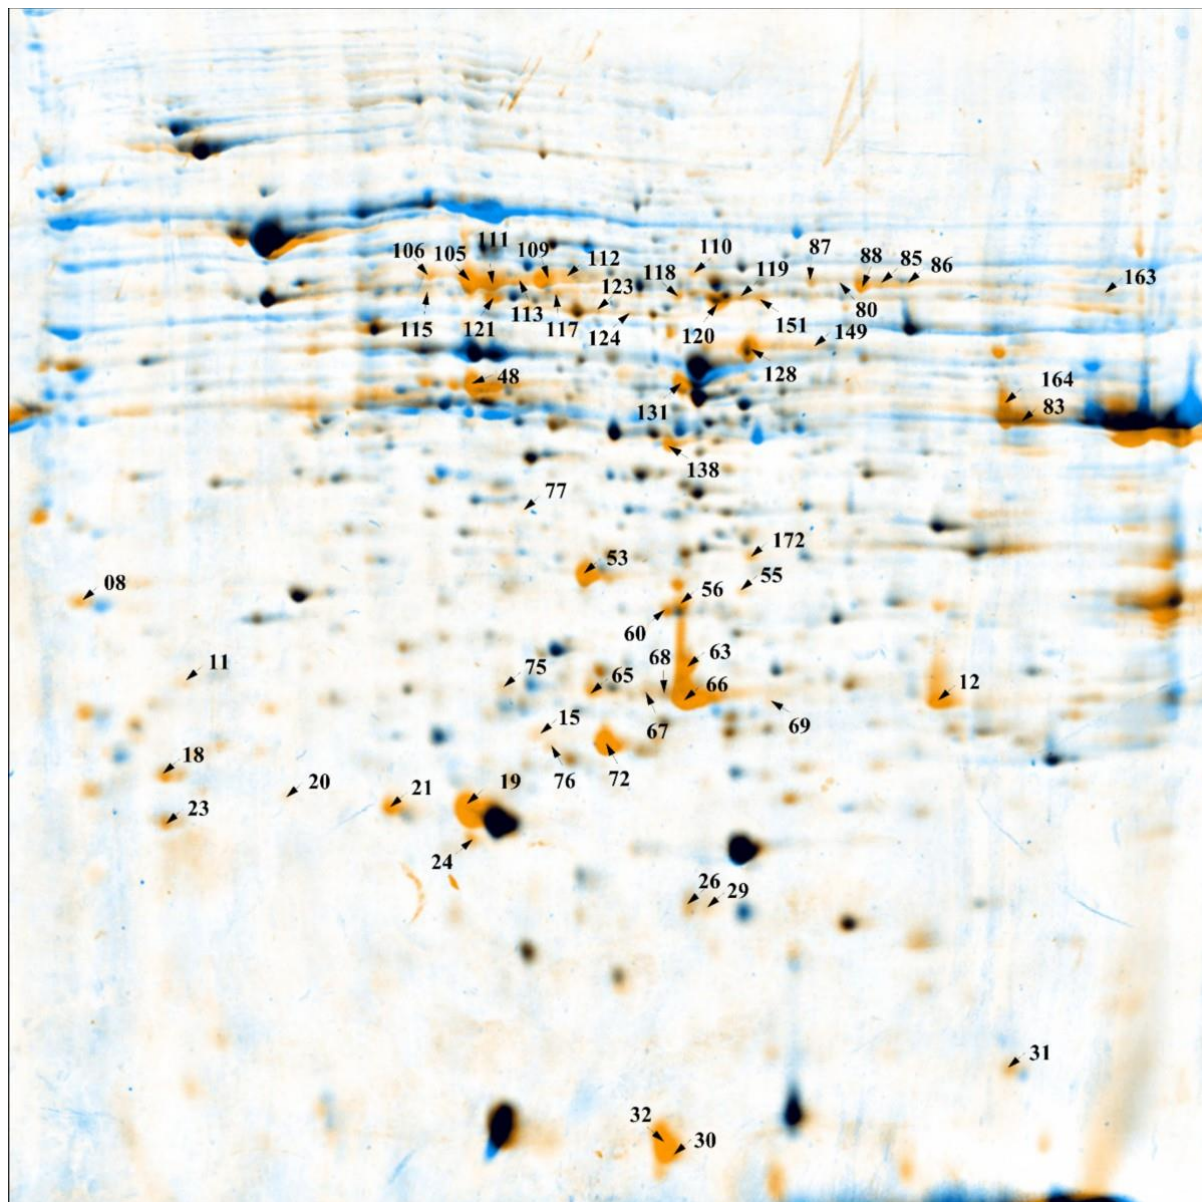

Supplement: S5 (10.1371/journal.pone.0211876.s005) [file journal.pone.0211876.s005]
